# Supplementary material
Source: PubMed Central journal article supplement (PMC9663602)
Supplement: 41467_2022_34500_MOESM1_ESM.pdf [file 41467_2022_34500_MOESM1_ESM.pdf]

# Supplementary information

## **H7N9 avian influenza virus infection in men is associated with testosterone depletion**

Tian Bai, Yongkun Chen, Sebastian Beck, Stephanie Stanelle-Bertram, Nancy Kouassi Mounogou, Tao Chen, Jie Dong, Bettina Schneider, Tingting Jia, Jing Yang, Lijie Wang, Andreas Meinhardt, Antonia Zapf, Lothar Kreienbrock, Dayan Wang, Yuelong Shu, Gülsah Gabriel

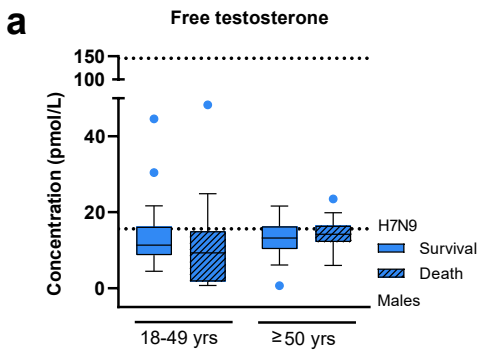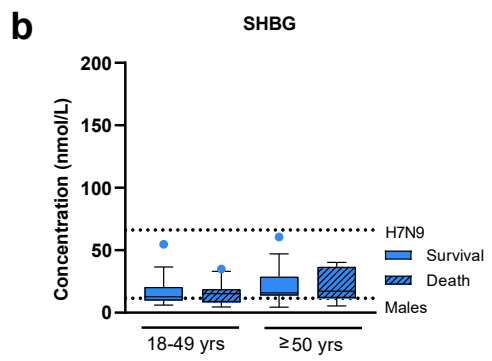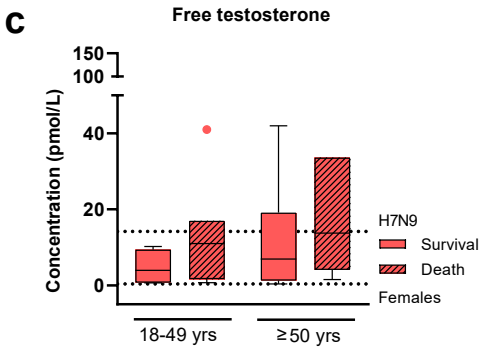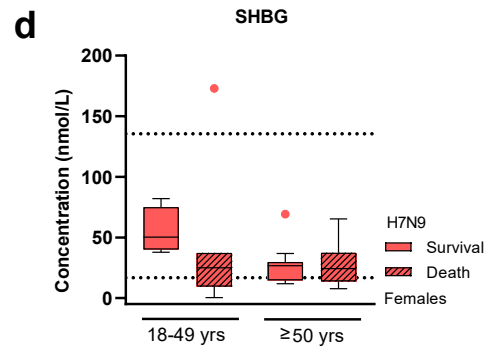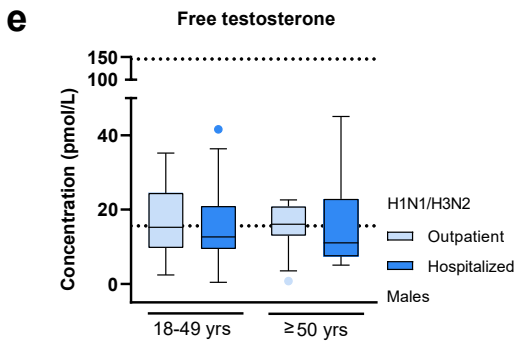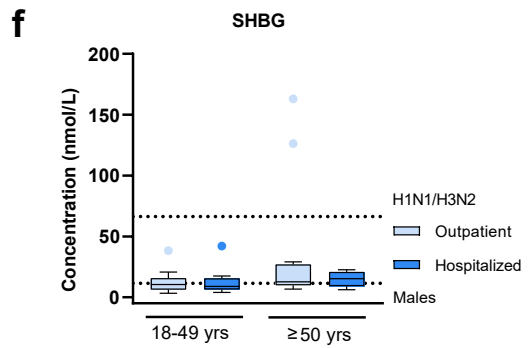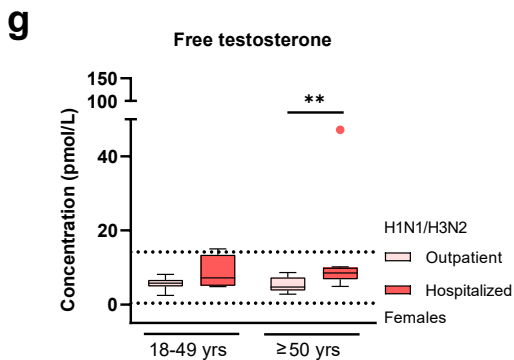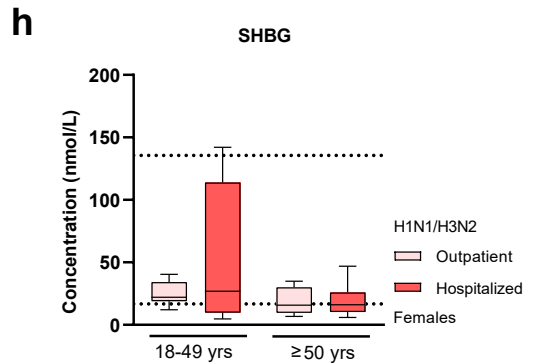

## Supplementary Figure 1: Free testosterone and SHBG levels in H7N9 and seasonal influenza cases

(a, b) Shown are the free testosterone and sex hormone binding globulin (SHBG) levels from H7N9-infected male patients in dependency of disease outcome in each age group (18-49 yrs survival/death: n=18/15,  $\geq 50$  yrs survival/death: n=27/11); (c, d) Shown are the free testosterone and SHBG levels from H7N9-infected female patients in dependency of disease outcome in each age group (18-49 yrs survival/death: n=4/7,  $\geq 50$  yrs survival/death: n=10/6); (e, f) Shown are the free testosterone (18-49 yrs outpatient/hospitalized: n=15/11,  $\geq 50$  yrs outpatient/hospitalized: n=12/14) and SHBG levels (18-49 yrs outpatient/hospitalized: n=16/11,  $\geq 50$  yrs outpatient/hospitalized: n=12/14) from seasonal influenza-infected male patients in both age groups; (g, h) Shown are the free testosterone and SHBG levels from seasonal influenza-infected female patients in both age groups (18-49 yrs outpatient/hospitalized: n=12/4,  $\geq 50$  yrs n=13/10). (a-g) Data are presented as Box-and-whisker plots (Tukey). The horizontal line in each box represents the median value. The 25th-75th percentiles represent the endpoints of the box. The whiskers stretch to the lowest and highest values within 1.5 times the interquartile range (IQR) from the 25th-75th percentiles. Dots represent outliers according to Tukey's definition. The two dotted lines in each figure represent the reference ranges for free testosterone (a, e: 15.6-145.6 (pmol/L); c, g: 0.35-14.21 (pmol/L)) and SHBG (b, f: 11.5-66.3 (nmol/L); d, h: 16.8-135.5 (nmol/L)). Statistically significant differences between groups were determined using unpaired, two-tailed non-parametric analysis (Mann-Whitney test), and a *P* value of  $< 0.05$  was considered significant (\*  $p < 0.05$ , \*\*  $p < 0.01$ , \*\*\*  $p < 0.001$ , \*\*\*\*  $p < 0.0001$ ). Source data are provided as Source Data File.

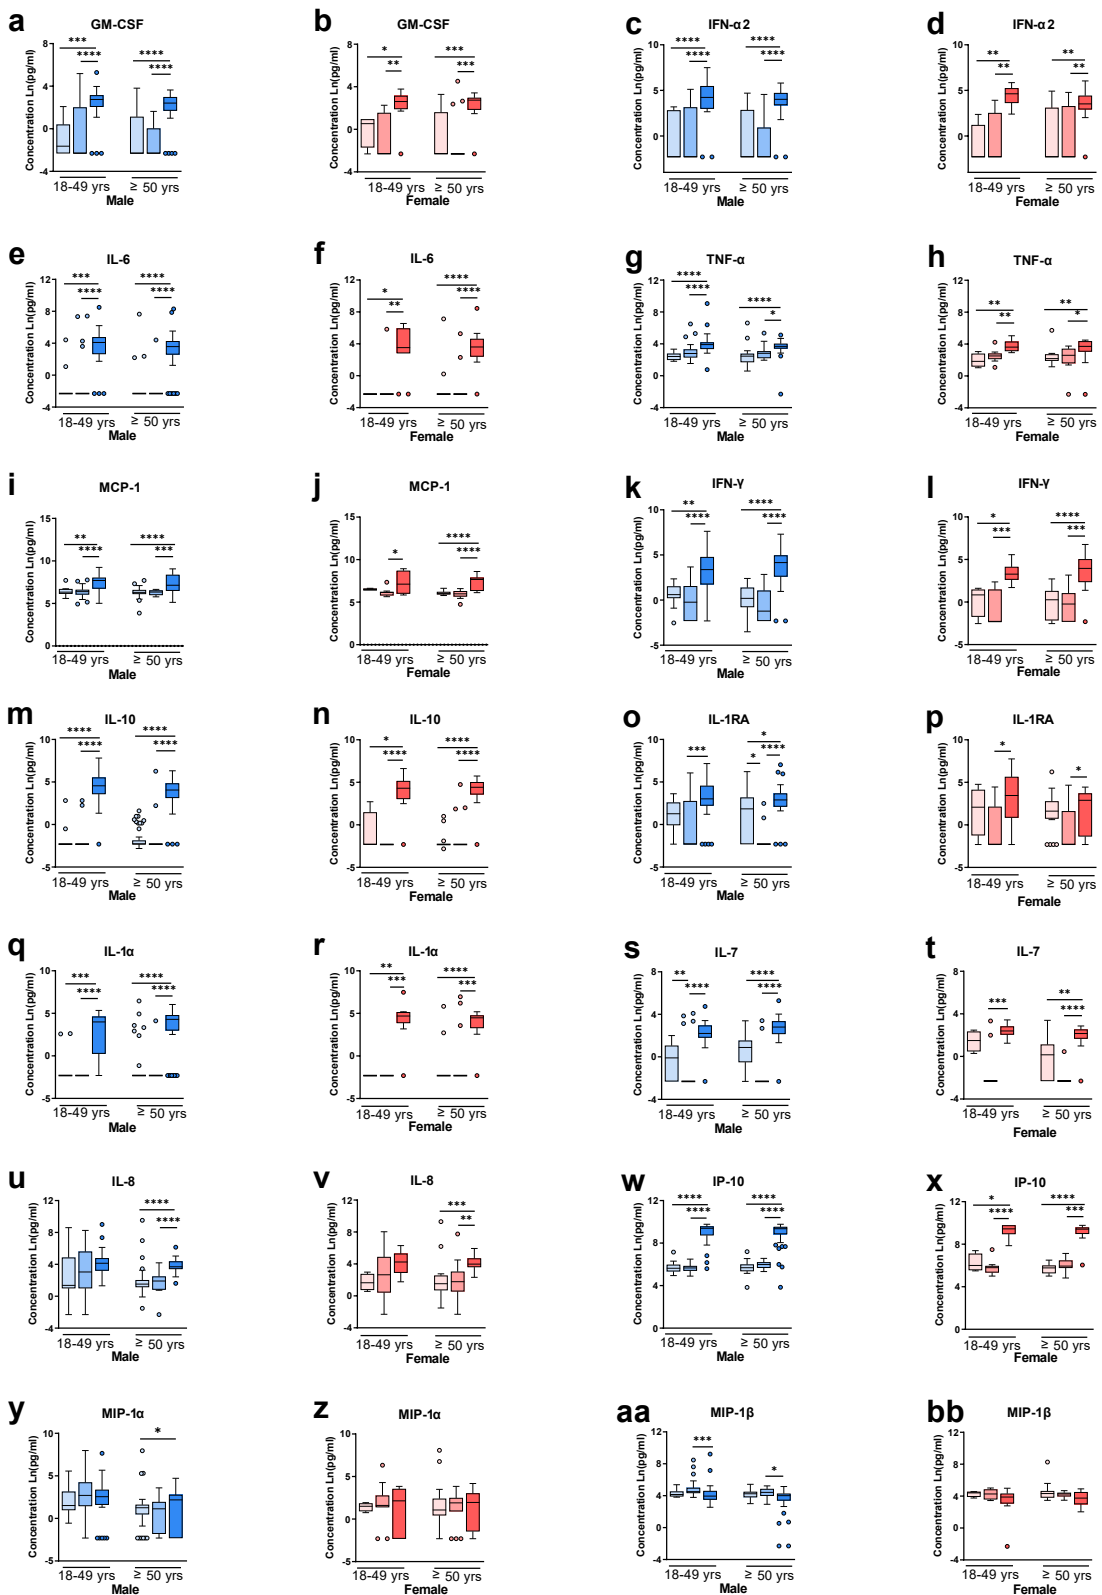

Males

- H7N9-negative poultry workers
- H7N9-negative close contacts
- H7N9 cases

Females

- H7N9-negative poultry workers
- H7N9-negative close contacts
- H7N9 cases

## Supplementary Figure 2:

### Cytokine and chemokine response in H7N9 IAV-infected patients compared to control groups

(a-bb) Shown are the expression levels of cytokines and chemokines in the sera from H7N9 IAV-infected male and female patients who were significantly altered compared to control groups, each divided into two groups based on age: 18-49 years (yrs) and  $\geq 50$  years old. The number of samples in males were as follows: poultry workers (18-49 yrs: n=12,  $\geq 50$  yrs: n=45), H7N9 close contacts (18-49 yrs: n=29,  $\geq 50$  yrs: n=16), and H7N9 cases (18-49 yrs: n=33,  $\geq 50$  yrs: n=38). The number of samples in females were as follows: poultry workers (18-49 yrs: n=4,  $\geq 50$  yrs: n=20), H7N9 close contacts (18-49 yrs: n=11,  $\geq 50$  yrs: n=15), and H7N9 cases (18-49 yrs: n=10,  $\geq 50$  yrs: n=16). Cytokine/chemokine expression values were used after Ln (*natural logarithm*) transformation. The measurement was carried out using a multiplex immunoassay. The following analytes were included: GM-CSF (granulocyte-macrophage colony-stimulating factor; a, b), IFN- $\alpha 2$  (interferon alpha 2; c, d), IL-6 (interleukin 6; e, f), TNF- $\alpha$  (tumor necrosis factor alpha; g, h), MCP-1/CCL2 (monocyte chemoattractant protein 1; i, j), IFN- $\gamma$  (interferon gamma; k, l), IL-10 (interleukin-10; m, n), IL-1RA (interleukin 1 receptor antagonist; o, p), IL-1 $\alpha$  (interleukin 1 alpha; q, r), IL-7 (interleukin 7; s, t), IL-8 (interleukin 8; u, v), IP10/CXL10 (interferon gamma-induced protein 10; w, x), MIP-1 $\beta$ /CCL4 (macrophage inflammatory protein 1 beta; y, z) and MIP-1 $\alpha$ /CCL3 (macrophage inflammatory protein 1 alpha; aa, bb). Data are presented as Box-and-whisker plots (Tukey). The horizontal line in each box represents the median value. The 25th-75th percentiles represent the endpoints of the box. The whiskers stretch to the lowest and highest values within 1.5 times the interquartile range (IQR) from the 25th-75th percentiles. Dots represent outliers according to Tukey's definition. Statistically significant differences between groups were determined using the Kruskal-Wallis test and Dunn's post hoc test. A *P* value of  $< 0.05$  was considered a significant difference (\*  $p < 0.05$ , \*\*  $p < 0.01$ , \*\*\*  $p < 0.001$ , \*\*\*\*  $p < 0.0001$ ). Source data are provided as Source Data File.

# G-CSF

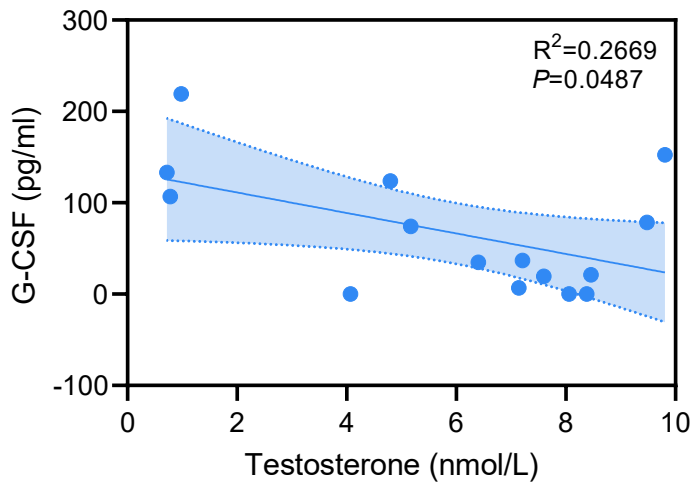

H1N1/H3N2 male outpatients (18-49 yrs)

### **Supplementary Figure 3:**

#### **Linear regression analysis of testosterone-modulated inflammatory immune responses in seasonal influenza-infected males**

Shown is the observed regression between testosterone and G-CSF (granulocyte colony-stimulating factor) in seasonal influenza male outpatients aged 18-49 years (n=15). Testosterone expression levels measured in the plasma from seasonal IAV-infected male outpatients were plotted over the respective G-CSF levels. Two-tailed linear regression analysis was performed from outpatients and hospitalized patients, and no adjustment for multiple hypotheses was performed due to the explorative nature of the study. The best-fit line with 95% confidence intervals is shown. The measure of centre for the error bands is the regression line. The R squared and *P* values are shown in the graph. Source data are provided as Source Data File.

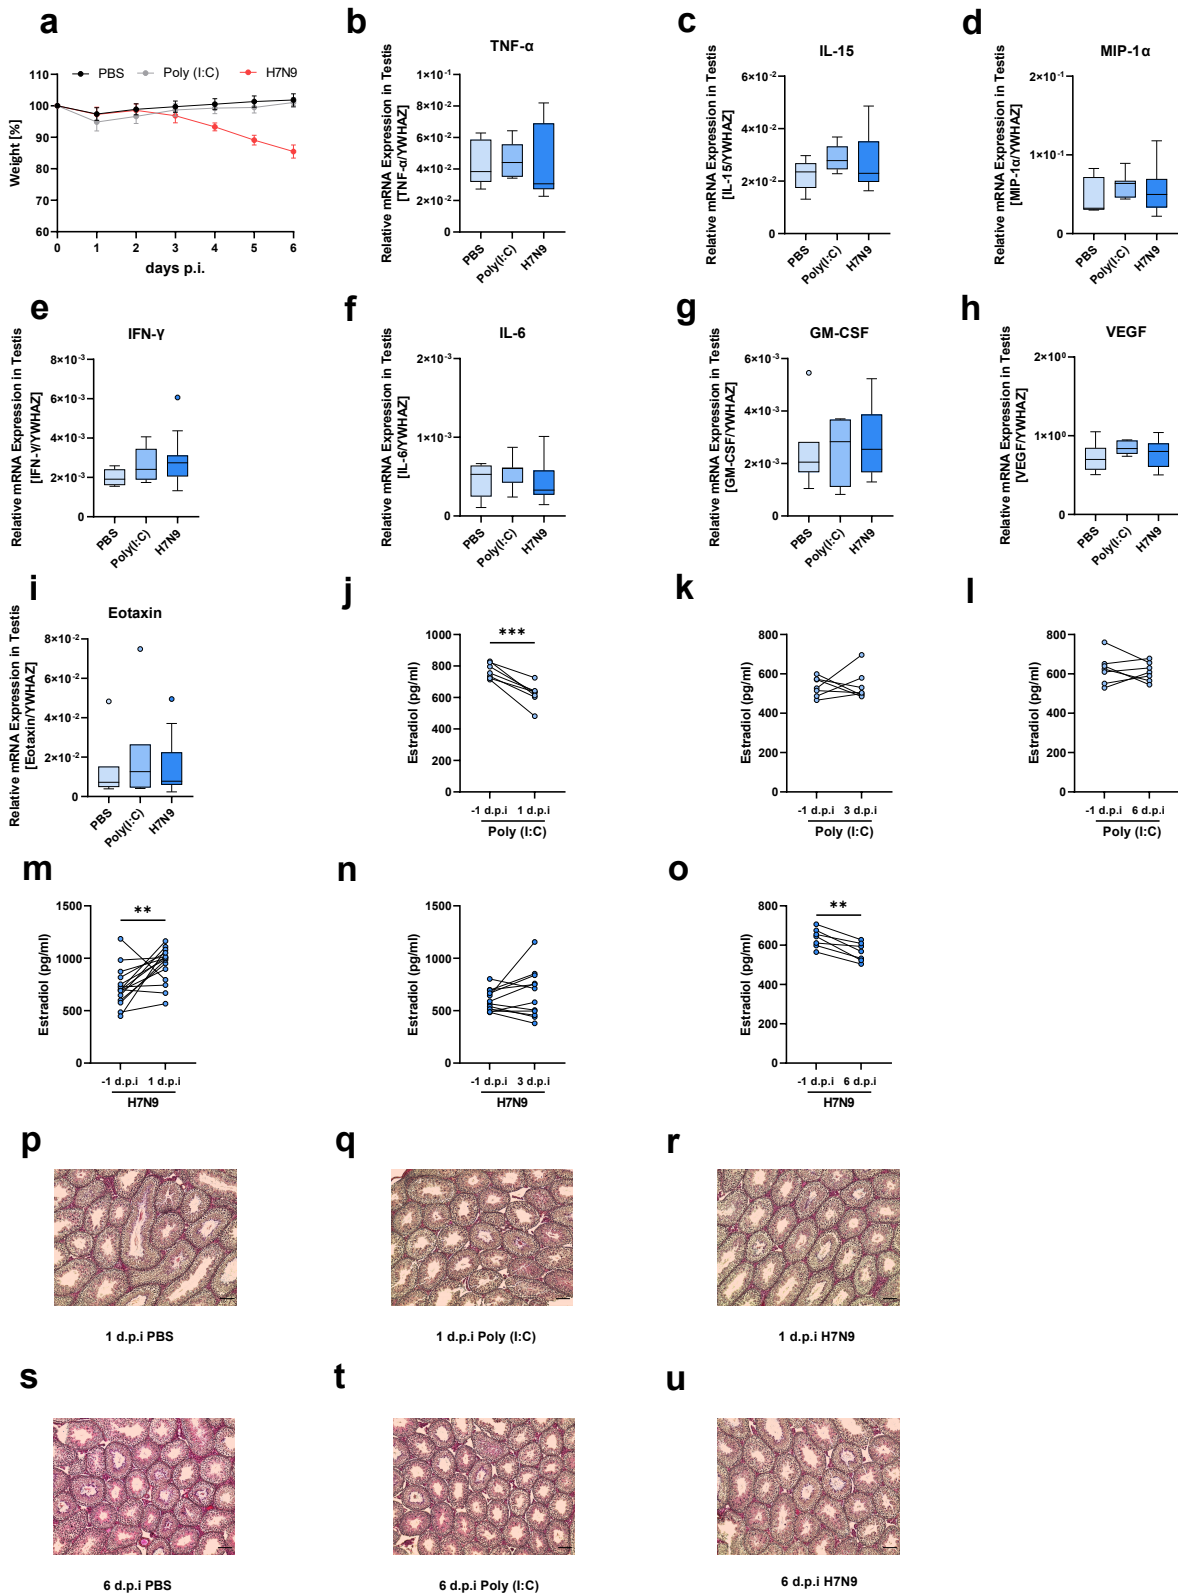



## Supplementary Figure 4:

### Weight loss, testicular inflammation, histopathology and estradiol levels in H7N9 infected mice

(a) Weight loss of PBS-, Poly (I:C)- and H7N9-treated mice up to 6 d.p.i (b-i) Cytokine and chemokine levels without significant differences in the testes from PBS (n=7)-, Poly (I:C)- (n=7)- and H7N9 (n=16)-treated mice at 3 d.p.i. Data are presented as Box-and-whisker plots (Tukey). The horizontal line in each box represents the median value. The 25th-75th percentiles represent the endpoints of the box. The whiskers stretch to the lowest and highest values within 1.5 times the interquartile range (IQR) from the 25th-75th percentiles. Dots represent outliers according to Tukey's definition. (j-l) Estradiol levels in Poly (I:C)-treated mice at 1 day before treatment (-1 d.p.i) vs. treated mice at 1 day (n=7 vs. n=7), 3 days (n=7 vs. n=7) and 6 days (n=7 vs. n=7) post treatment. (m-o) Estradiol levels in H7N9-infected mice at 1 day before infection (-1 d.p.i) vs. infected mice at 1 day (n=15 vs. n=15), 3 days (n=12 vs. n=12) and 6 days post infection (n=7 vs. n=7). (p-u) Hematoxylin and eosin (HE)-stained paraffin sections from Bouin fixed testis tissue at 1 (p-r) and 6 d.p.i (s-u) were evaluated via light microscopy. Shown are representative histological images of the testes of PBS (1 d.p.i., n=6; 6 d.p.i., n=7)- or Poly (I:C) (1 d.p.i., n=6; 6 d.p.i., n=7)-control treated and H7N9-infected (1 d.p.i., n=6; 6 d.p.i., n=7) mice (10X). Scale bars (100  $\mu$ m) are shown in the bottom right of each micrograph. (b-i) Statistically significant differences among the three groups were determined using either two-tailed one-way ANOVA or the Kruskal-Wallis test (b-i). (j-o) Statistically significant differences in estradiol were determined by paired, two-tailed *t test* or non-parametric analysis (j-o). A *P* value of < 0.05 was considered a significant difference (\* *p* < 0.05, \*\* *p* < 0.01, \*\*\* *p* < 0.001, \*\*\*\* *p* < 0.0001). Source data are provided as Source Data File.

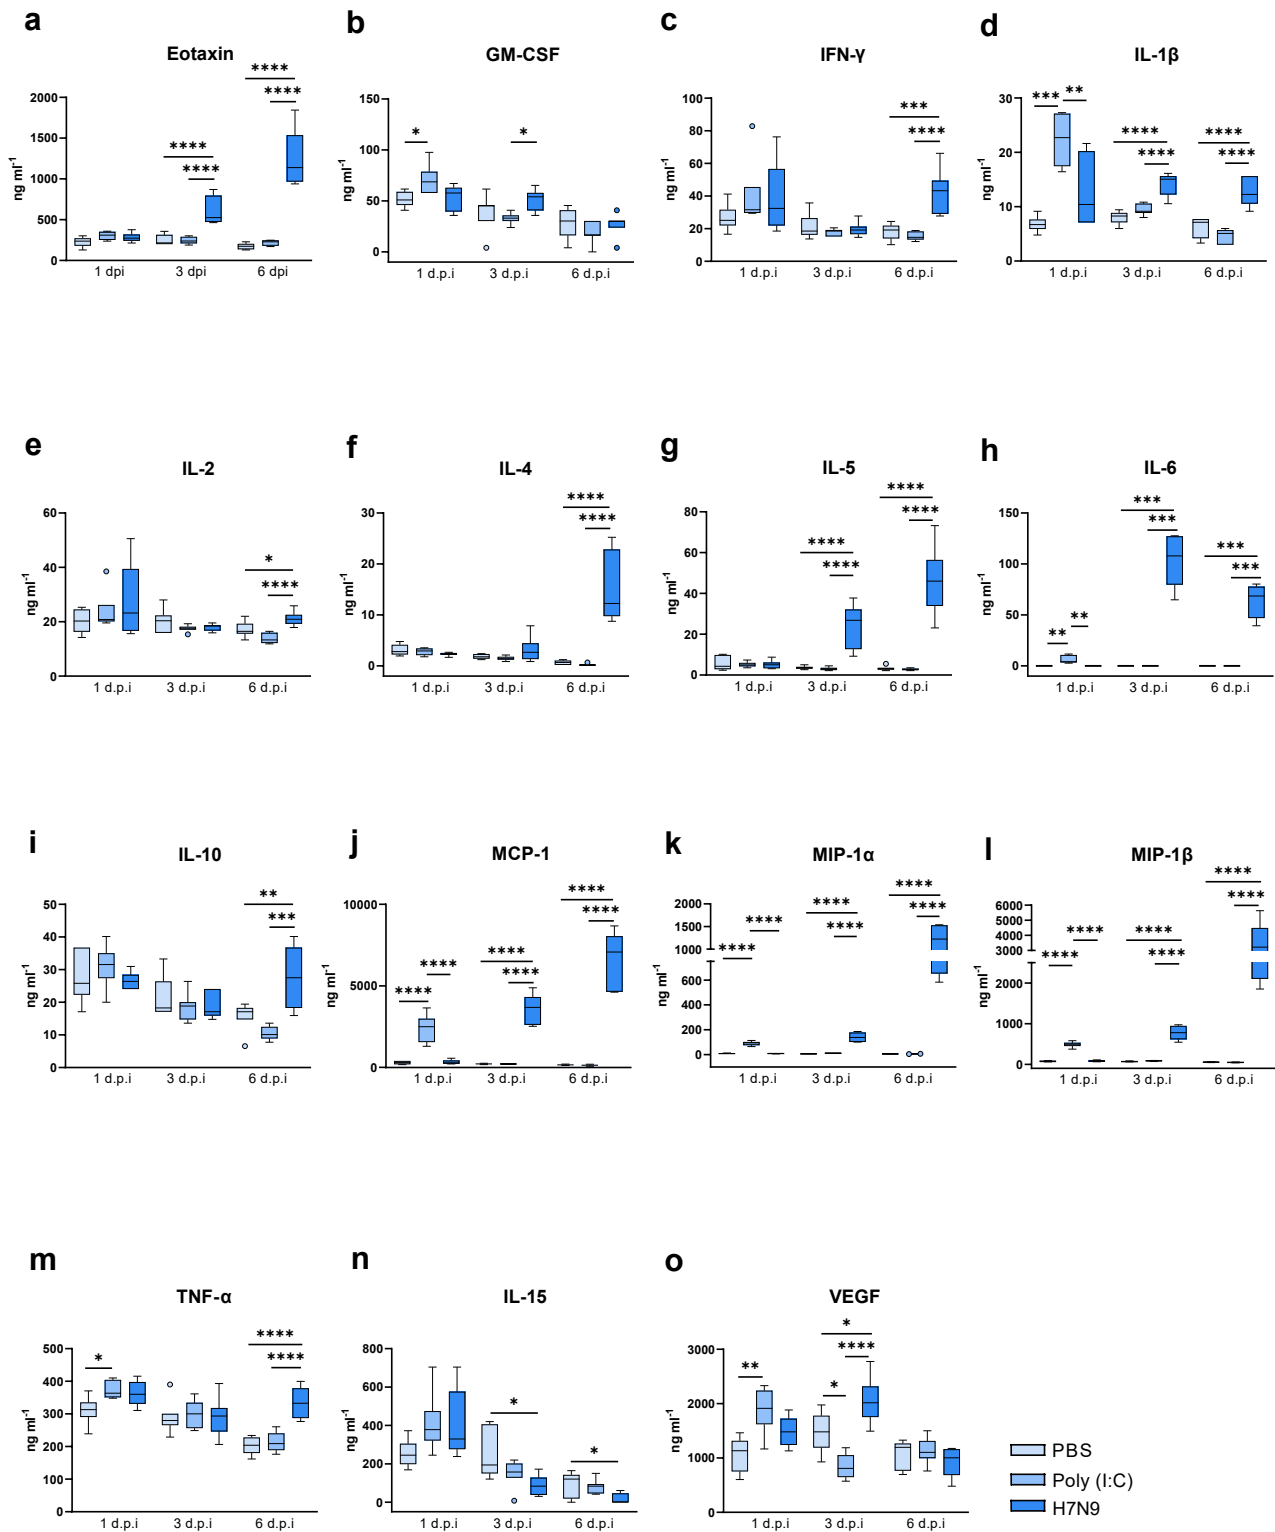

## Supplementary Figure 5:

### Pulmonary inflammatory response in H7N9-infected mice

(a-o) Cytokines and chemokines were measured in the lungs of PBS and Poly (I:C) control-treated or H7N9 infected mice at 1d.p.i (PBS: n=6, Poly (I:C): n=6, H7N9:n=6), 3 d.p.i (PBS: n=7, Poly (I:C):n=7, H7N9: n=7) and 6 d.p.i (PBS: n=7, Poly (I:C): n=7, H7N9:n=using a Bio-Plex Pro Mouse Cytokine multiplex assay. The following analytes were included: Eotaxin (a), GM-CSF (Granulocyte-macrophage colony-stimulating factor; b), IFN- $\gamma$  (interferon gamma; c), IL-1 $\beta$  (interleukin 1 beta; d), IL-2 (interleukin 2; e), IL-4 (interleukin 4; f), IL-5 (interleukin 5; g), IL-6 (interleukin 6; h), IL-10 (interleukin 10; i), MCP-1 (monocyte chemoattractant protein 1; j), MIP-1 $\alpha$  (macrophage inflammatory protein 1 alpha; k), MIP-1 $\beta$  (macrophage inflammatory protein 1 beta; l), TNF- $\alpha$  (tumor necrosis factor alpha; m), IL-15 (interleukin 15; n), and VEGF (vascular epidermal growth factor; o). Data are presented as box-and-whisker plots (Tukey). The horizontal line in each box represents the median value. The 25th-75th percentiles represent the endpoints of the box. The whiskers stretch to the lowest and highest values within 1.5 times the interquartile range (IQR) from the 25th-75th percentiles. Dots represent outliers according to Tukey's definition. Statistically significant differences among groups were determined using either two-tailed ANOVA or the Kruskal-Wallis test. A *P* value of < 0.05 was considered a significant difference (\* *p* < 0.05, \*\* *p* < 0.01, \*\*\* *p* < 0.001, \*\*\*\* *p* < 0.0001). Source data are provided as Source Data File.

## Supplementary Tables

**Supplementary Table 1. qRT-PCR primers for murine cytokines/chemokines and the host gene used in this study**

| Gene                            | Sequence 5'-3'                    |
|---------------------------------|-----------------------------------|
| <i>TNF-<math>\alpha</math></i>  | Forward: CAGAAAGCATGATCCGCGAC     |
|                                 | Reverse: GGCCATAGAACTGATGAGAGGG   |
| <i>MIP-1<math>\alpha</math></i> | Forward: CAGCCAGGTGTCATTTTCCTG    |
|                                 | Reverse: CTCGATGTGGCTACTTGGCA     |
| <i>MIP-1<math>\beta</math></i>  | Forward: AACCTAACCCCGAGCAACAC     |
|                                 | Reverse: GGGTCAGAGCCCATTGGTG      |
| <i>IFN-<math>\gamma</math></i>  | Forward: AGGTCAACAACCCACAGGTC     |
|                                 | Reverse: GAATCAGCAGCGACTCCTTT     |
| <i>IL-1<math>\beta</math></i>   | Forward: GAGCCATCCTCTGTGACTC      |
|                                 | Reverse: AGCTCATATGGGTCCGACAG     |
| <i>IL-10</i>                    | Forward: GGTTGCCAAGCCTTATCGGA     |
|                                 | Reverse: CACCTTGGTCTTGGAGCTTATT   |
| <i>IL-6</i>                     | Forward: CTCCCAACAGACCTGTCTATAC   |
|                                 | Reverse: GTGCATCATCGTTGTTTCATAC   |
| <i>Eotaxin</i>                  | Forward: GAGCTCCACAGCGCTTCTAT     |
|                                 | Reverse: GAAGTTGGGATGGAGCCTGG     |
| <i>VEGF</i>                     | Forward: TCTGAGAGAGGCCGAAGTCC     |
|                                 | Reverse: GCGGGGTGCTTTTGTAGACT     |
| <i>IL-15</i>                    | Forward: CGCCCAAAGACTTGCAGTG      |
|                                 | Reverse: GGTGGATTCTTTCCTGACCTCT   |
| <i>GM-CSF</i>                   | Forward: AAGGTCCTGAGGAGGATGTGG    |
|                                 | Reverse: GTCTGCACACATGTTAGCTTCTTG |
| <i>YWHAZ</i>                    | Forward: CACGCTCCCTAACCTTGCTT     |
|                                 | Reverse: ATCGTAGAAGCCTGACGTGG     |

**Supplementary Table 2. Additional characteristics of H7N9 cases**

| Characteristic                             | 18-49 years (n=44) | ≥50 years (n=54) |
|--------------------------------------------|--------------------|------------------|
| Time from illness onset to sampling (days) |                    |                  |
| Median                                     | 6.5                | 7.5              |
| Q1-Q3                                      | 5-8.3              | 6-9              |
| Antiviral treatment (%)                    |                    |                  |
| Yes                                        | 39 (89%)           | 46 (85%)         |
| No                                         | 5 (11%)            | 8 (15%)          |
| Year (%)                                   |                    |                  |
| 2014-2016                                  | 10 (23%)           | 10 (19%)         |
| 2017                                       | 34 (77%)           | 44 (81%)         |
| Region (%)                                 |                    |                  |
| South                                      | 32 (73%)           | 33 (61%)         |
| North                                      | 12 (27%)           | 21 (39%)         |

Data are median (25th quartile-75th quartile, Q1-Q3) or *n* (%).
